# Supplementary material for: Facile Stereoselective Reduction of Prochiral Ketones by using an F420‐dependent Alcohol Dehydrogenase
Source: PubMed Central journal article supplement (PMC7820951; doi:10.1002/cbic.202000651), 2020-10-23
Supplement: CBIC-22-156-s001.pdf [file CBIC-22-156-s001.pdf]

# ChemBioChem

Supporting Information

## **Facile Stereoselective Reduction of Prochiral Ketones by using an F<sub>420</sub>-dependent Alcohol Dehydrogenase**

Caterina Martin, Gwen Tjallinks, Milos Trajkovic, and Marco W. Fraaije\*

## Table of Contents

|                                                                              |    |
|------------------------------------------------------------------------------|----|
| Expression and purification of F <sub>420</sub> -dependent ADF and FGD ..... | 2  |
| Steady state kinetics analyses .....                                         | 2  |
| Isopropanol tolerance .....                                                  | 3  |
| Conversions .....                                                            | 4  |
| Substrate 1 .....                                                            | 4  |
| Substrate 2 .....                                                            | 5  |
| Substrate 3 .....                                                            | 6  |
| Substrate 4 .....                                                            | 7  |
| Substrate 5 .....                                                            | 8  |
| Substrate 6 .....                                                            | 9  |
| Substrate docking .....                                                      | 10 |
| References .....                                                             | 10 |

### Expression and purification of F<sub>420</sub>-dependent ADF and FGD

An Adf-encoding gene fragment was ordered codon optimized for *Escherichia coli* and cloned into a pBAD to have the construct expressed with a C-terminal His-tag. Expression was performed using *Escherichia coli* NEB 10 $\beta$ . Cells carrying the plasmid were grown in Terrific broth (TB) supplemented with 50  $\mu\text{g mL}^{-1}$  ampicillin until OD<sub>600</sub> was 0.8 and expression was induced with L-arabinose 0.02% at 24 °C overnight. Cells were harvested by centrifugation at 5000  $\times$  g for 20 min at 4 °C. Cell pellets were resuspended in 250 mM sodium phosphate buffer pH 7.0 containing 1 mM phenylmethylsulfonyl fluoride and 10% v/w glycerol. The cells were lysed by sonication, using a Sonics Vibra-Cell VCX 130 sonicator with a 3 mm stepped microtip (5s on, 5s off, 70 % amplitude, 7 min). Cell debris were pelleted by centrifugation at 12000  $\times$  g for 20 min at 4 °C. The supernatant was applied to Ni-Sepharose High Performance (GE Healthcare) pre-equilibrated with 250 mM sodium phosphate pH 7.0, 10% v/w glycerol. The washing buffer was 250 mM sodium phosphate pH 7.0, 10% v/w glycerol, 10 mM imidazole and the elution buffer was 250 mM sodium phosphate pH 7.0, 10% v/w glycerol, 500 mM imidazole. The eluted protein was desalted using a desalting column pre-equilibrated with 250 mM sodium phosphate pH 7.0, 10% v/w glycerol. FGD was purified as previously described.<sup>[1]</sup> Purity of ADF and FGD was assessed with SDS-PAGE analysis and protein concentrations were measured by using the Bradford assay.

### Steady state kinetics analyses

The employed assay measures the rate at which F<sub>420</sub> is reduced ( $\epsilon_{400} = 25.7 \text{ mM}^{-1} \text{ cm}^{-1}$ ). The buffer used was 250 mM sodium phosphate (pH 7.0), 10% v/w glycerol. For obtaining  $K_M$  and  $k_{cat}$  values, the data were fit using a regular Michaelis-Menten equation:  $k_{obs} = k_{cat} * [S] / K_M + [S]$ .

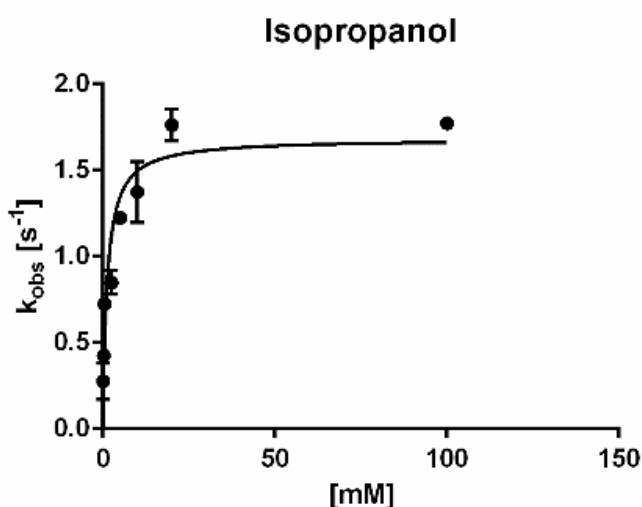

|                                      |
|--------------------------------------|
| $K_M$                                |
| $1.3 \pm 0.5 \text{ mM}$             |
| $k_{cat}$                            |
| $1.7 \pm 0.1 \text{ s}^{-1}$         |
| $k_{cat} / K_M$                      |
| $1.3 \text{ s}^{-1} \text{ mM}^{-1}$ |

### Isopropanol tolerance

The tolerance of ADF towards isopropanol was probed by measuring its apparent melting temperature by ThermoFluor. <sup>[2]</sup> Using a real-time PCR the temperature at which ADF unfolds in the presence of different concentrations of isopropanol was measured. For the measurements, 250 mM sodium phosphate pH 7.0, 10% glycerol, 1x Sypro Orange, and 10  $\mu$ M ADF was used.

**Table 1.** Thermostability of ADF in the presence of isopropanol.

| Isopropanol Concentration (mM) | $T_m^{\text{app}}$ ( $^{\circ}$ C) |
|--------------------------------|------------------------------------|
| 50                             | 57.5 $\pm$ 0                       |
| 100                            | 57.5 $\pm$ 0                       |
| 200                            | 56.0 $\pm$ 0                       |
| 500                            | 53.5 $\pm$ 0                       |
| 1000                           | 49.5 $\pm$ 0                       |

## Conversions

### Substrate 1

Analyzed using: Agilent Technologies 7890A GC system with column CP Chiralsil Dex CB (Agilent).  
Program: 40 °C to 130 °C in 5 min, hold 130 °C 10 min, 130 °C to 180 °C in 10 min, hold 180 °C in 5 min.

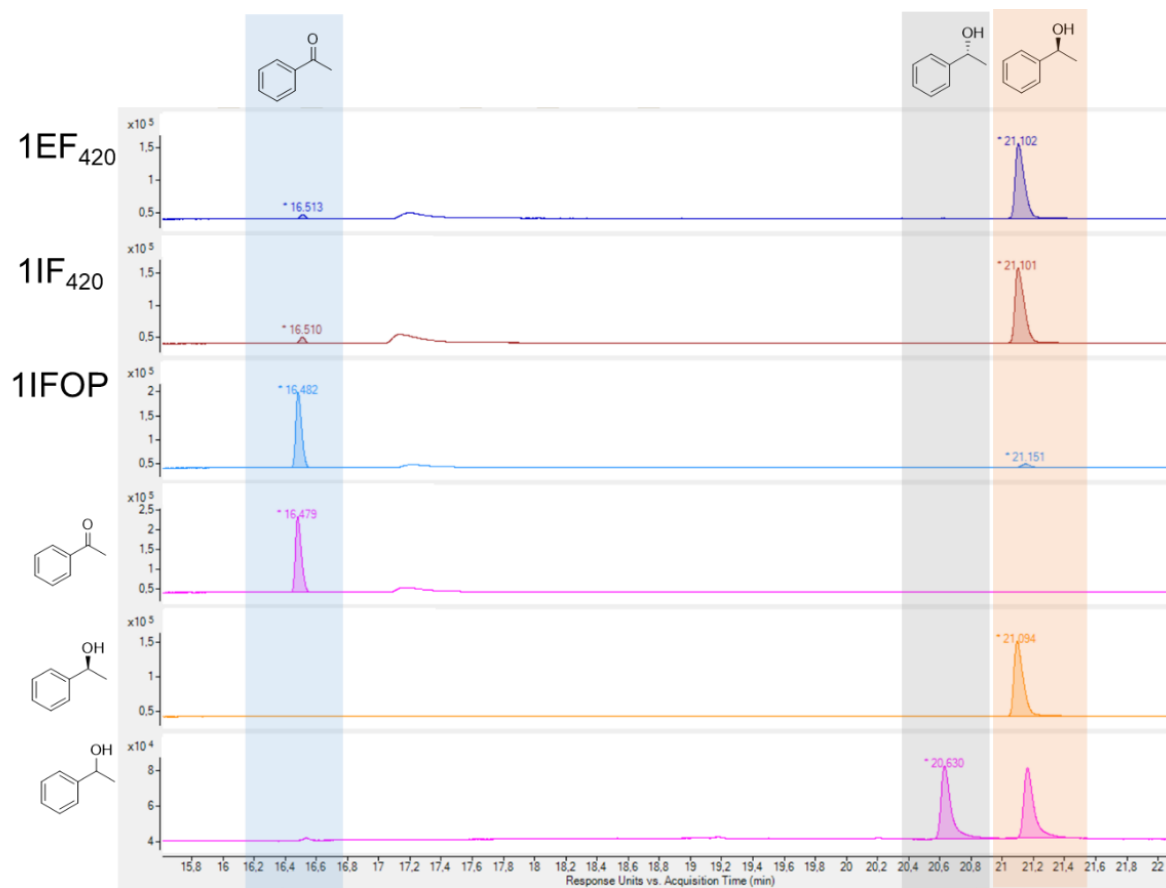

## Substrate 2

Analyzed using: Agilent Technologies 7890A GC system with column CP Chiralsil Dex CB (Agilent).  
Program: 40 °C to 130 °C in 5 min, hold 130 °C 10 min, 130 °C to 180 °C in 10 min, hold 180 °C in 5 min.

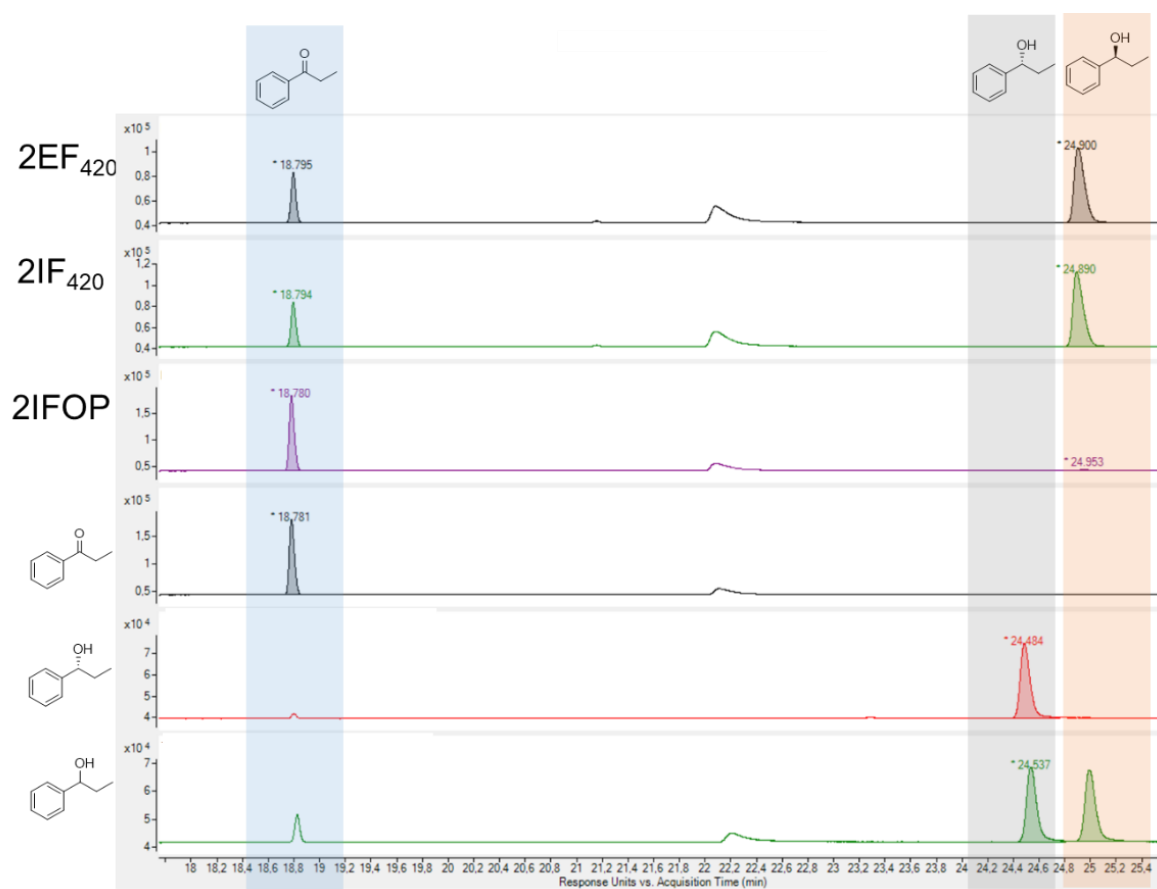

### Substrate 3

Analyzed using: Agilent Technologies 7890A GC system with column CP Chiralsil Dex CB (Agilent).  
Program: 40 °C to 120 °C in 3 min, 120 °C to 40 °C in 10 min.

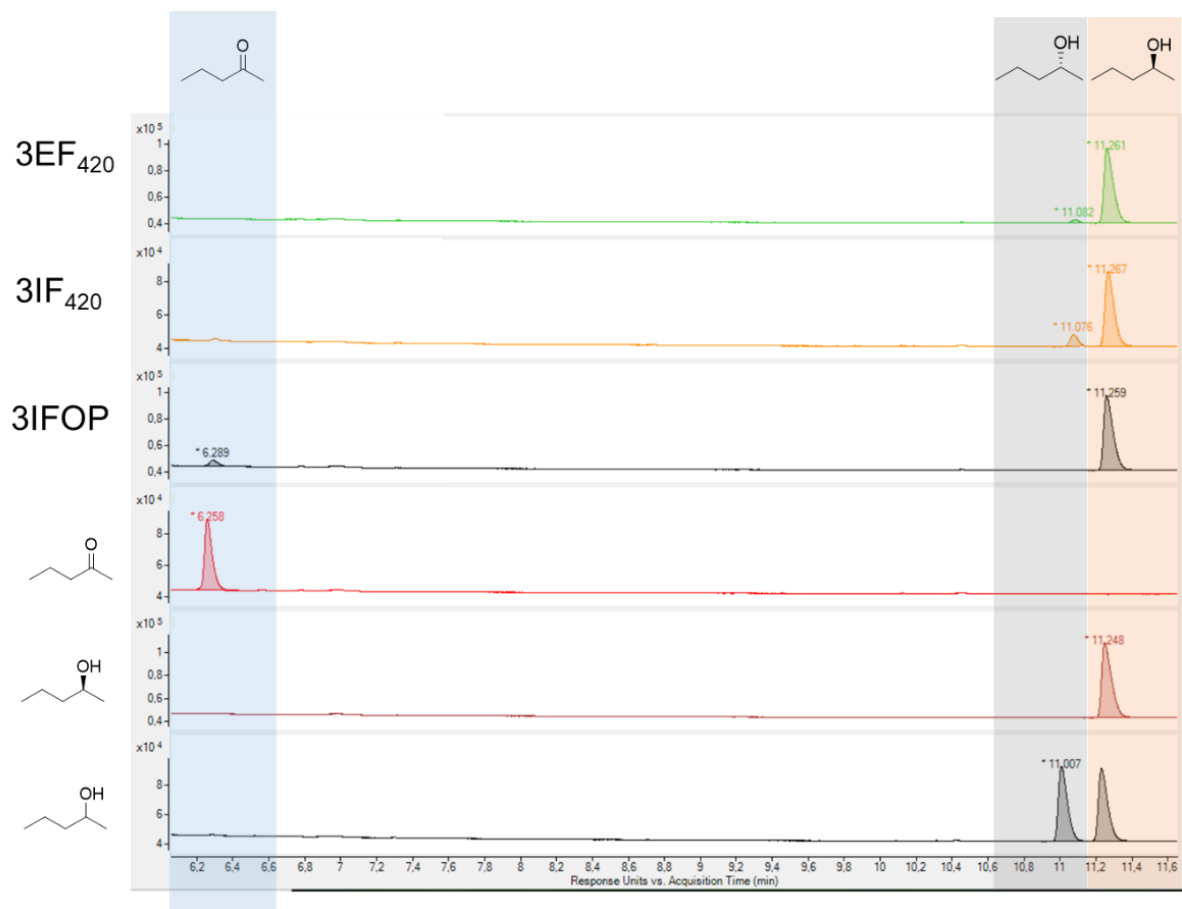

## Substrate 4

Analyzed using: Agilent Technologies 7890A GC system with column CP Chiralsil Dex CB (Agilent).  
Program: 40 °C to 140 °C in 5 min, 140 °C to 40 °C in 10 min.

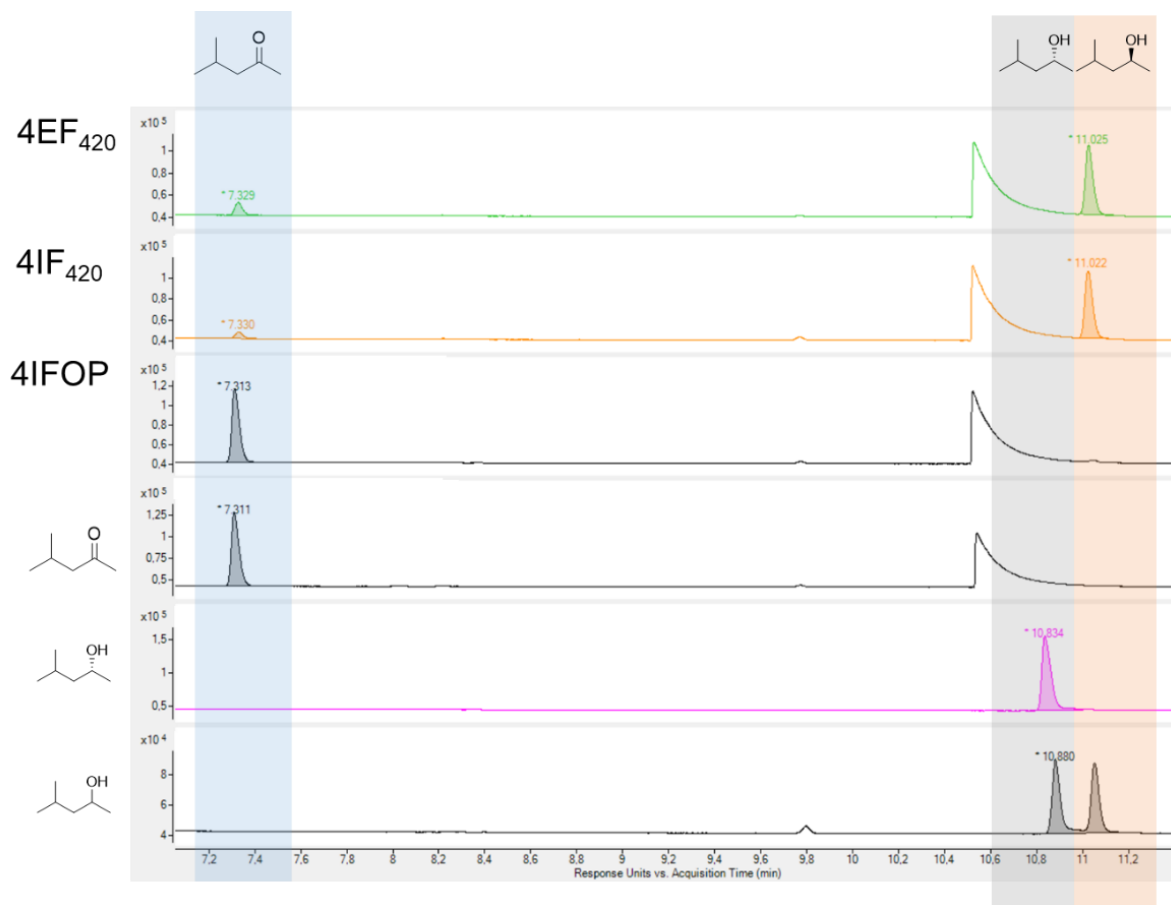



## Substrate 5

Analyzed using: Agilent Technologies 7890A GC system with column FS-Hydrodex-B-TBDAC (Aurora Borealis) Program: 40 °C to 190 °C in 5 min, 190 °C to 40 °C in 10 min.

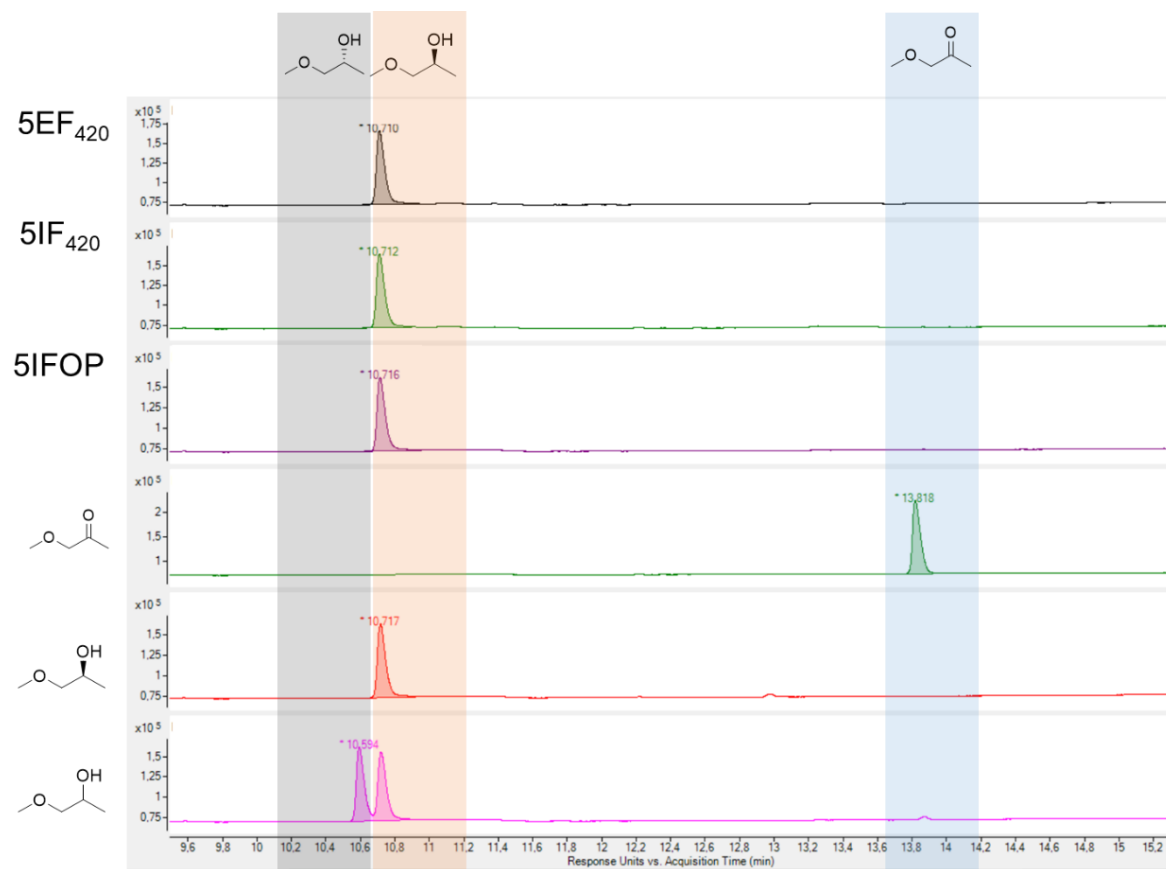

## Substrate 6

Analyzed using: Agilent Technologies 7890A GC system with column FS-Hydrodex-B-TBDAC (Aurora Borealis) Program: 40 °C to 190 °C in 5 min, 190 °C to 40 °C in 10 min.

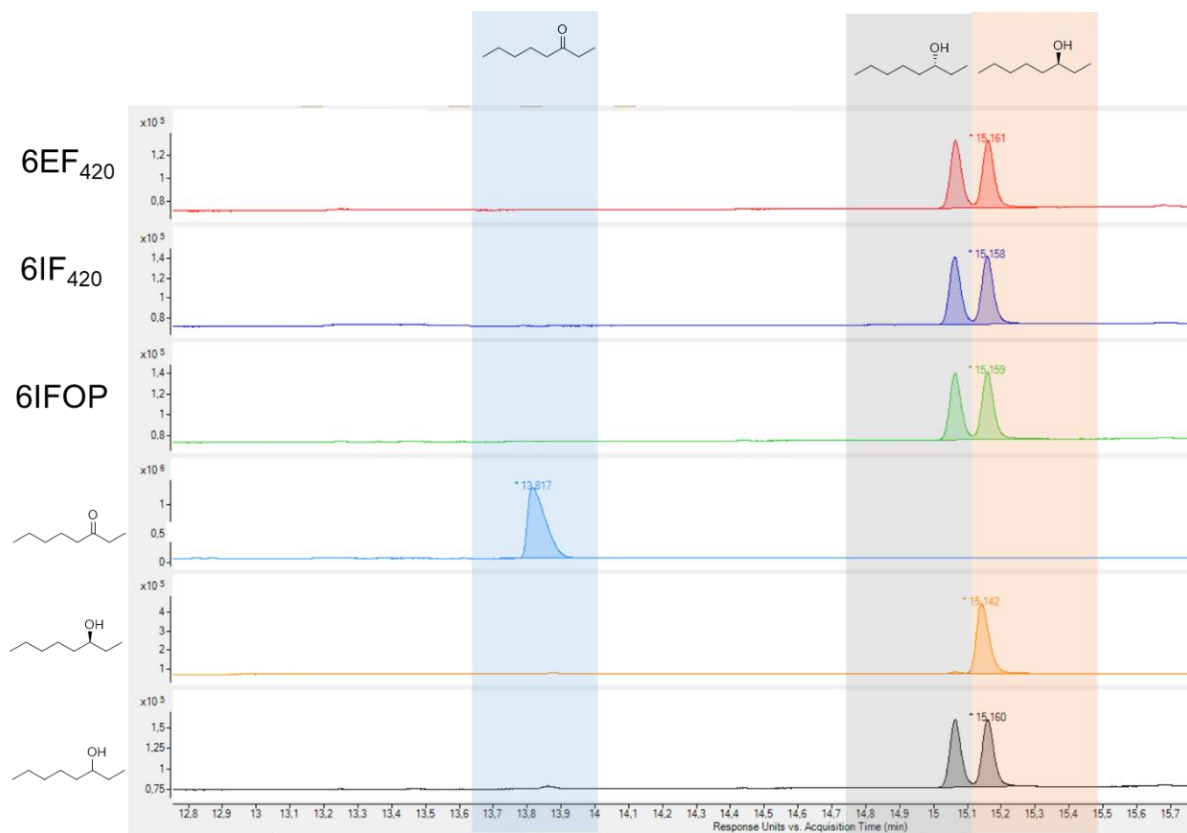

### Substrate docking

Molecular docking was performed in YASARA Structure (version 19.12.14).<sup>[3]</sup> The crystal structure of ADF (1.8 Å resolution; PDB 1RHC<sup>[4]</sup>) was used. Substrates were built using YASARA, energy minimization was performed, and VINA was employed to perform the docking.<sup>[5]</sup> Docking was accomplished using the docking simulation macro 'dock\_run.mrc' with a 5 Å cube cell size around the C5 atom of F<sub>420</sub>, 100 runs, 2 Å cluster RMSD and using the YAMBER forcefield.<sup>[6]</sup> YASARA and UCSF Chimera were used to visualize the results.<sup>[7]</sup> Pymol was used for preparing the figures.

### References

- [1] Q. T. Nguyen, G. Trinco, C. Binda, A. Mattevi, M. W. Fraaije, *Appl. Microbiol. Biotechnol.* **2017**, *101*, 2831–2842.
- [2] F. Forneris, R. Orru, D. Bonivento, L. R. Chiarelli, A. Mattevi, *FEBS J.* **2009**, *276*, 2833–2840.
- [3] C. Guilbert, T. L. James, *J. Chem. Inf. Model.* **2008**, *48*, 1257–1268.
- [4] S. W. Aufhammer, E. Warkentin, H. Berk, S. Shima, R. K. Thauer, U. Ermler, *Structure* **2004**, *12*, 361–370.
- [5] O. Trott, A. J. Olson, *J. Comput. Chem.* **2012**, *32*, 174–182.
- [6] E. Krieger, T. Darden, S. B. Nabuurs, A. Finkelstein, G. Vriend, *Proteins Struct. Funct. Genet.* **2004**, *57*, 678–683.
- [7] E. F. Pettersen, T. D. Goddard, C. C. Huang, G. S. Couch, D. M. Greenblatt, E. C. Meng, T. E. Ferrin, *J. Comput. Chem.* **2004**, *25*, 1605–1612.
